# Supplementary material for: Human CD8+ T-cells Recognizing Peptides from Mycobacterium tuberculosis (Mtb) Presented by HLA-E Have an Unorthodox Th2-like, Multifunctional, Mtb Inhibitory Phenotype and Represent a Novel Human T-cell Subset
Source: PLoS Pathog. 2015 Mar 24;11(3):e1004671. doi: 10.1371/journal.ppat.1004671 (PMC4372528; doi:10.1371/journal.ppat.1004671)
Supplement: S1 Table — Flow cytometry data are expressed as % of CD3+CD8+ cells. Cytokine data from multiplex bead arrays (‘luminex’) are secreted cytokines expressed as pg/ml, min indicates cytokine production in the absence of stimulation (macrophages present in well), max indicates cytokine production in response to αCD3/28 T-cell activator beads (no macrophages present). DcRT-MLPA RNA expression data are peak areas normalized for GAPDH expression levels. (XLSX) [file ppat.1004671.s003.xlsx]

## Sheet: ultimate table
#	clone	phenotype																																													HLA E specificity on K562/E		TCR specificity
		(%)												NK like markers (%)						cytotoxic markers (%)								Treg like (%)									Th1/17 like (%)					Th2 like (%)					ΔMFI	ΔMFI	ΔMFI
		CD3+	CD4+	CD8+	CD4+8+	TCRαβ	CD45RA+	CD45RA+CCR7+	CD45RA-CCR7+	CD45RA-CCR7-	CCR7+	CCR7+CD27-	CCR7+CD27+	CD16	CD56	CD94	NKG2A	NKG2C	NKG2D	eomes	GranzymeA	GranzymeB	Granulysin	Perforin	GranzymA+Perforin+	GranzymeB+Perforin+	Granulysin+Perforin+	FoxP3	CD25+	CD39+	LAG3+	CD25+LAG3+CD39+	CD127	CTLA4	CCL4	IL-10	Tbet	RORC	IFNγ	IL-2	TNF	GATA%	GATA+eomes+	IL-4	IL-5	IL-13	CD137	Zap70 Y292	Zap70 Y319
#1	D2-1B4	99	0	99	0	89.2	4.65	4.63	94.2	1.19	98.8	96.8	0.792	14.1	50	4.72	2.18	6.57	9.39	1.9	94	87.4	69.8	47	36	40.1	40.7	2.6	75.8571	83.1	75.6	59.081	1.6	87.7	11.6	1.26	1.63	1.16	36.6	0.478	41.3	27.8	16.2	0.37	17.8	24	219	1500	54
#2	D2-1B9	99	0	95	0	95.9	1.36	1.36	98.2	0.407	99.6	98.3	0.193	2.34	0.0375	0.72	0.349	0.101	0.055	0.016	90.6	73.5	21	9.83	4	7.26	2.63	1.68	80.5117	3.76	64.5	3.2498	1.57	88.9	1.7	0.128	0.843	0.467	0.156	0.289	2.59	29.9	5.81	1.64	5.13	2.67	272	102	44
#3	D2-4A1	99	0	99	0	98.4	0.696	0.692	99.2	0.0833	99.9	99.3	0.396	7.41	2.34	1.64	0.625	2.61	1.59	4.53	92.1	71.9	13.9	8.27	5	6.44	4.12	4.65	76.0887	77.4	76.6	61.782	1.69	93.9	9.35	0.294	1.79	3.87	4.41	0.402	16.7	36.9	21.5	1.08	4.42	8.19	419	55	0
#4	D2-2F6	99	0	99	0	75.9	4.25	4.25	95.7	0.0519	99.9	99.3	0.49	4.42	0.656	1.46	0.686	0.973	0.176	0.83	81.7	88.5	67.6	2.22	1	1.59	1.17	3.25	79.444	81.9	80.9	70.316	3.18	98.2	2.35	0.191	1.89	2.96	0.184	0.454	6.43	34.7	15.7	7.03	6.98	5.27	601	230	10
#5	D2-1D1	99	0	98	0	93.4	1.29	1.28	98.4	0.293	99.7	98.3	0.981	7.19	21.1	1.96	0.4	0.899	6.7	1.31	94.9	78.5	56.9	34.6	24	29.7	26.8	2.4	99.7	0.622	99.5	0.586	0.622	86.5	8.99	0.208	4.12	5.68	5.44	0.342	15.5	32.9	18.7	0.52	1.04	6.7	0	52	113
#6	D2-1C9	99	0	99	0	97	0.657	0.652	99.2	0.121	99.9	99.2	0.338	2.79	0.608	0.754	0.465	0.215	0.909	5.13	99.2	94	61.1	76.8	62	71.7	50.8	3.26	73.6	96.6	16.4	11.7	0.37	84.2	2.35	0.0486	2.65	1.63	0.716	0.205	4.78	34	20.2	21.5	12.6	1.02	158	376	156
#7	D2-2B3	99	0	99	0	85.6	1.6	1.6	98	0.361	99.6	97.7	1.38	11	33.6	3.47	1.18	3.06	9.65	2.35	93.3	80.2	54.3	31.3	23	25.9	25.6	3.88	72.4029	29.6	73.1	24.208	1.24	85.6	29.3	0.919	4.35	2.64	25.1	0.462	31	30.3	17	16.7	22.6	16.6	481	482	49
#8	D2-2A9	99	0	95.8	0	80.9	0.752	0.578	26.7	72.6	27.3	19	0.0176	13.4	43.8	3.98	0.644	4.54	11.5	0.035	96.3	94.6	80.5	87.9	78	81.7	73.5	8.4	62.4	83.5	57.4	33.5	1.31	88.5	8.76	0.804	0.28	0.109	12.2	0.574	22.6	82.6	0.0603	nt	nt	9.62	318	0	0
#9	D2-4G5	99	0	99	0	nt	nt	nt	nt	nt	nt	nt	nt	nt	nt	nt	nt	nt	nt	nt	nt	nt	nt	nt	nt	nt	nt	nt	58.1182	64.3	77.2	46.0625	nt	nt	nt	nt	nt	nt	nt	nt	nt	nt	nt	nt	nt	nt	281	nt	nt
#10	D2-3H11	99	0	0	97	nt	nt	nt	nt	nt	nt	nt	nt	nt	nt	nt	nt	nt	nt	nt	nt	nt	nt	nt	nt	nt	nt	nt	51.4988	52.8	74.2	35.639	nt	nt	nt	nt	nt	nt	nt	nt	nt	nt	nt	nt	nt	nt	599	nt	nt
#11	D6-1G6	99	0	98	0	88.3	15.4	12.8	84.6	0	97.3	81	15.7	7.11	5.98	3.07	1.78	4.04	1.29	0.78	79.7	49.4	9	10.7	7	8.54	2.32	3.65	89.4092	97.7	95.3	86.261	3.55	77	4.59	1.11	5.79	21.7	11.5	0.441	12.7	29.1	13.1	2.9	39.3	5.11	280	8	5
#12	D6-1A3	99	0	99	0	-*	0.991	0.988	98.9	0.0652	99.9	99.7	0.116	1.95	9.46	0.589	0.352	0.212	2.47	2.04	92.2	79.6	42.8	56.6	43	48.8	31.9	6.26	57.9	98.6	50.6	34.1	0.159	85.3	10.8	0.0689	4.38	8.65	3.48	0.148	11.1	33.9	13.5	3.21	3.41	5.11	0	20	0
#13	D6-2B1	99	0	99	0	90.6	14.6	14.6	85.1	0.36	99.6	66.6	32.3	9.74	0.706	2.89	3.11	10.7	0.917	2.55	71	44.5	3.98	8.14	5	5.48	2.29	5.69	89.9182	4.91	81.8	4.57	4.59	77.7	2.27	0.711	4.61	22.6	5.88	0.324	12.3	30.2	12.5	5.73	79.4	3.64	1173	94	28
#14	D6-2B4	99	0	99	0	92.8	2.25	2.24	97.5	0.224	99.8	98.8	0.409	4.13	7.93	0.898	0.327	0.833	0.271	0.05	99.2	95.4	56.7	23.2	16	20	18.7	1.49	73.2	98.6	38.8	26.3	1.16	90.1	7.89	0.179	1.49	1.86	2.65	0.38	18.2	28.7	5.09	0.11	2.01	7.08	383	38	39
#15	D6-1F11	99	0	99	0	98.7	4.19	4.19	94.7	1.1	98.9	97	0.152	1.71	0.3	0.576	0.511	0.133	0.0398	0.09	88.2	89.7	56.2	1.87	1	1.36	1.21	3.09	79.6	99.6	21.3	15.8	1.01	93.9	18.2	0.0818	1.07	1.17	0.459	0.196	10.3	30.9	9.61	11.4	64	11.4	322	1756	120
#16	D6-1H3	99	0	97	0	nt	nt	nt	nt	nt	nt	nt	nt	nt	nt	nt	nt	nt	nt	nt	nt	nt	nt	nt	nt	nt	nt	nt	92.1978	48.9	92.7	46.007	nt	nt	nt	nt	nt	nt	nt	nt	nt	nt	nt	nt	nt	nt	107	nt	nt
						*TCRγδ +
[truncated: 93 more columns]

## Sheet: table 1
	marker	match	no match	criterium
		+	-	for positivity
	CD3+	16/16	0/16	>90%
	CD4+	0/16	0/16	>90%
	CD8+	15/16	1/16	>90%
	CD4+8+	1/16	15/16	>90%
	TCRαβ	12/13	1/13	>75%
	TCRγδ	1/13	12/13	>75%
	CD45RA-CCR7+	12/13	1/13	>70%
	CD45RA-CCR7-	1/13	12/13	>70%
	CCR7+	12/13	1/13	>70%
	CCR7+CD27-	11/13	2/13	>70%
	CD16+	0/13	13/13	>50%
	CD56+	1/13	12/13	>50%
	CD94+	0/13	13/13	>10%
	NKG2A+	0/13	13/13	>10%
	NKG2C+	0/13	13/13	>10%
	NKG2D+	0/13	13/13	>10%
	CD25+	16/16	0/16	>50%
	CD39+	11/16	5/16	>50%
	LAG3+	13/16	3/16	>50%
	CD127+	0/13	13/13	>50%
	CTLA4+	13/13	0/13	>50%
	GranzymeA+	13/13	0/13	>50%
	GranzymeB+	11/13	2/13	>50%
	Granulysin+	8/13	5/13	>50%
	Perforin+	3/13	10/13	>50%
	Tbet+	0/13	13/13	>10%
	RORC+	0/13	13/13	>10%
	GATA3+	13/13	0/13	>10%
	eomes+	9/13	4/13	>10%
	FoxP3+	0/13	13/13	>10%

## Sheet: delfts blauwe tegel
			MLPA									Luminex								ICS
			IFNγ	TNF	IL-2	GATA3	IL-4	IL-5	IL-10	IL-13		IFNγ	TNF	IL-2	IL-4	IL-5	IL-10	IL-13		IFNγ	TNF	IL-2	GATA3	IL-4	IL-5	IL-10	IL-13
	D6-1A3		1368.26	1615.73	200	639.136	502.752	3592.95	200	1753.62		730.87	220.37	16.13	46.29	4329.6	362.39	8249.21		3.48	11.1	0.1	54.2	3.21	3.41	0.0689	5.11
	D6-1G6		1160.28	2953.09	200	602.225	789.171	570.442	200	1519.18		105.44	50.78	43.98	59.17	2466.54	1644.65	8320.37		11.5	12.7	0.4	56.2	2.9	39.3	1.11	5.11
	D2-2A9		nt	nt	nt	nt	nt	nt	nt	nt		8753.79	1365.19	264.14	63.34	593.86	63.64	6630.84		12.2	22.6	0	95.5	nt	nt	0.804	9.62
	D2-1C9		200	4050.32	200	1300.78	1150.24	1275.05	200	1912.58		930.95	156.98	18.71	93.02	783.39	125.11	8340.58		0.716	4.78	0.6	55.1	21.5	12.6	0.0486	1.02
	D2-1D1		nt	nt	nt	nt	nt	nt	nt	nt		3438.14	1118.63	183.41	93.66	1346.99	91.48	9152.71		5.44	15.5	0.2	56.1	0.52	1.04	0.208	6.7
	D2-2B3		5417.72	11731.5	1854.31	383.509	1061.36	2498.95	200	5482.41		3545.23	1199.82	177.74	250.37	1321.48	80.98	8696.01		25.1	31	0.3	54	16.7	22.6	0.919	16.6
	D2-1B4		4624.45	9837.26	1319.89	731.367	10256.9	5364.52	2926.88	12101.5		4872.29	1018.45	93.8	375.57	5054.45	62.67	9537.4		36.6	41.3	0.5	55.7	0.37	17.8	1.26	24
	D6-2B4		1263.11	3791.04	200	698.446	1105.32	4205.01	200	4611.26		856.12	393.44	11.16	429.81	6187.45	2057.18	10120.7		2.65	18.2	0.5	53.6	0.11	2.01	0.179	7.08
	D2-4A1		nt	nt	nt	nt	nt	nt	nt	nt		351.78	863.79	2179.54	1386.48	1069.55	16.07	1763.34		4.41	16.7	0.4	58	1.08	4.42	0.294	8.19
	D6-1H3		574.419	5782.84	407.539	2754.65	3207.99	15428	200	9520.21		69.53	197.04	25.98	2575.81	3225.08	12.13	10000		nt	nt	nt	nt	nt	nt	nt	nt
	D2-2F6		1309.2	9567.43	200	1904.46	8953.21	22594.2	200	13054.5		1297.93	367.76	25.34	2943.1	9958	1911.8	9148.42		0.184	6.43	nt	55.9	7.03	6.98	0.191	5.27
	D2-1B9		200	7320.08	208.979	3753.54	1067.13	7451.03	62057.6	10504.5		142.02	107.62	927.28	4161.3	6136.02	2319.82	9997.53		0.156	2.59	0.3	53.1	1.64	5.13	0.128	2.67
	D6-1F11		2105.65	5798.17	2725.3	1996.67	17074.9	51007.9	477.842	34028.6		810.76	456.08	52.03	5298.99	6984.37	5349.3	11248.4		0.459	10.3	0.2	52.3	11.4	64	0.0818	11.4
	D6-2B1		4260.23	5468.93	230.818	2149.62	7615.61	21760.9	4971.52	15324.9		786.62	236.57	19.74	9759.21	9073.87	10000	10784.9		5.88	12.3	0.3	56.2	5.73	79.4	0.711	3.64
	D2-3H11		22214.4	33176.4	13108.1	706.068	23924.4	14028.4	1049.36	30501.8		2393.98	2826.2	1884.76	10000	2895.7	1640.49	10000		nt	nt	nt	nt	nt	nt	nt	nt
	D2-4G5		58876	35196.2	18435.9	1170.8	13805.7	21096.9	10504.8	21757.3		nt	nt	nt	nt	nt	nt	nt		nt	nt	nt	nt	nt	nt	nt	nt
